# Supplementary material
Source: PubMed Central journal article supplement (PMC2717300)
Supplement: mmc1.pdf [file mmc1.pdf]

## Electronic Supporting Information

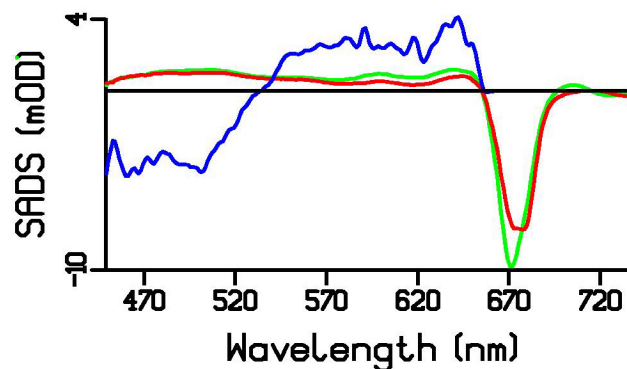

**ESI Figure 1.** SADS from the target analysis of the time-resolved data obtained from a kHz system upon 678 nm excitation. The kinetic model is depicted in figure 3(*upper panel*) of the text. The difference in the red shift from the Chl 1 compartment to the Chls 2,3 and 4 is due to a slightly bluer excitation wavelength.

| $k_1$ | $k_2$ | $k_3$ | $k_4$ | $k_5$ | $k_6$ | $k_Q$  | $k_8$ |
|-------|-------|-------|-------|-------|-------|--------|-------|
| 0.9   | 1.0   | 12.9  | 9     | 80    | 4(f)  | 100(f) | inf   |

**ESI Table 1.** Reciprocal of rate constants ( $\text{ps}^{-1}$ ) from the target analysis of the time-resolved data obtained from a kHz system upon 678 nm excitation; f stands for fixed parameter.

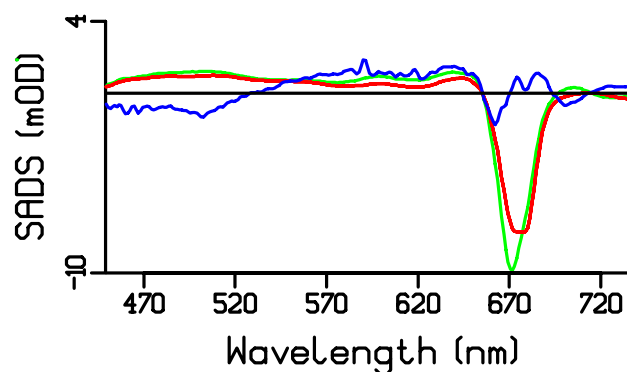

**ESI Figure 2.** SADS from the target analysis of the time-resolved data obtained from a kHz system upon 678 nm excitation. Here the zero constraint on the Q SADS was released, resulting in erratic amplitudes in the Chl  $Q_y$  region. Furthermore, the Q decay rate  $k_6$  was a free parameter, resulting in a Q SADS which is of similar shape below 655 nm but smaller amplitude. The estimated Q lifetime was 16 ps.

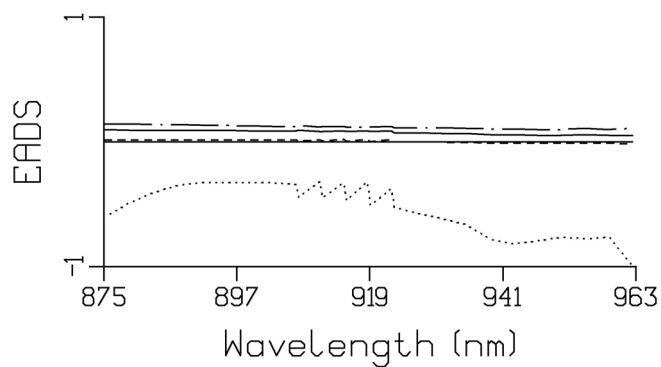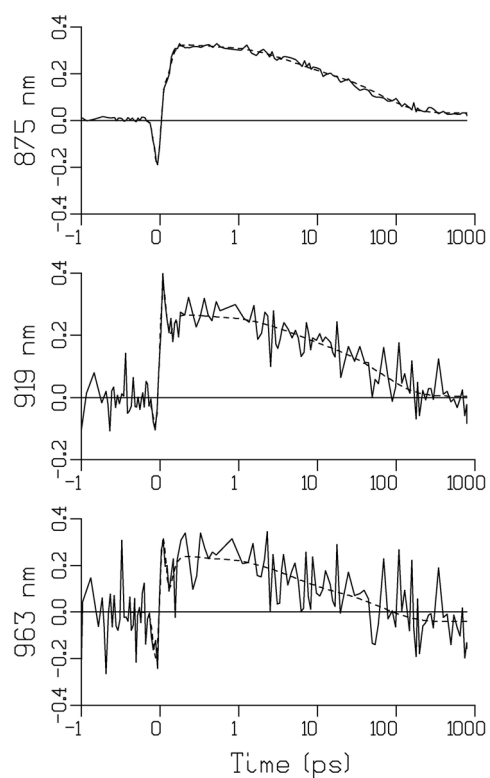

**ESI Figure 3.** (*Upper*) EADS from a global analysis of the time-resolved data in the nIR region. (*Lower*) Selected kinetic traces and corresponding fit from the global analysis. The amplitudes are in mOD.
